# Supplementary material for: Eu-COF-based fluorescence and portable detection of acetone in exhaled breath
Source: Royal Society of Chemistry journal article supplement (doi:10.1039/d5ay00230c), 2025-01-01
Supplement: d5ay00230c1.pdf [file d5ay00230c1.pdf]

## Electronic Supplementary Information

### **Eu-COF-based fluorescent and portable detection of acetone in exhaled breath**

Zhe Jiao<sup>a\*</sup>, Xiudong Shi<sup>b</sup>, Xiaolin Zhang<sup>a</sup>, Xiaofang Zhao<sup>c\*</sup>, Yueting Wang<sup>a</sup>, Feng Xu<sup>d</sup>, Jing Zhang<sup>b\*</sup>

<sup>a</sup>School of Environment and Civil Engineering, Dongguan Key Laboratory of Low-carbon and Recycling, Dongguan University of Technology, Dongguan 523808, China

<sup>b</sup>Department of Laboratory Medicine, Nanfang Hospital, Southern Medical University, Guangzhou 510515, China

<sup>c</sup>International School of Microelectronics, Dongguan University of Technology, Dongguan 523808, China

<sup>d</sup>Chongqing Fisheries Technical Extension Center, Chongqing, 400000, China

\*Corresponding author.

E-mail address: [jjaoz@dgut.edu.cn](mailto:jjaoz@dgut.edu.cn) (**Zhe Jiao**), [zhaoxf@dgut.edu.cn](mailto:zhaoxf@dgut.edu.cn) (**Xiaofang Zhao**), [zjsilence@i.smu.edu.cn](mailto:zjsilence@i.smu.edu.cn) (**Jing Zhang**)

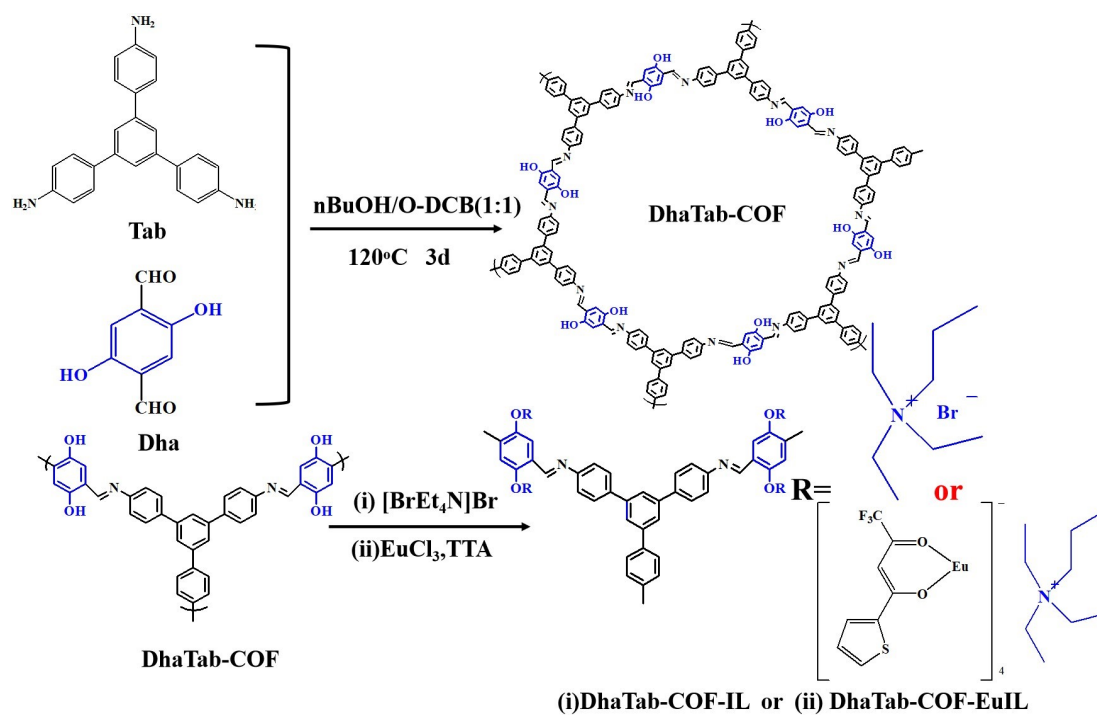

Figure S1 The synthetic routes for Eu-COF

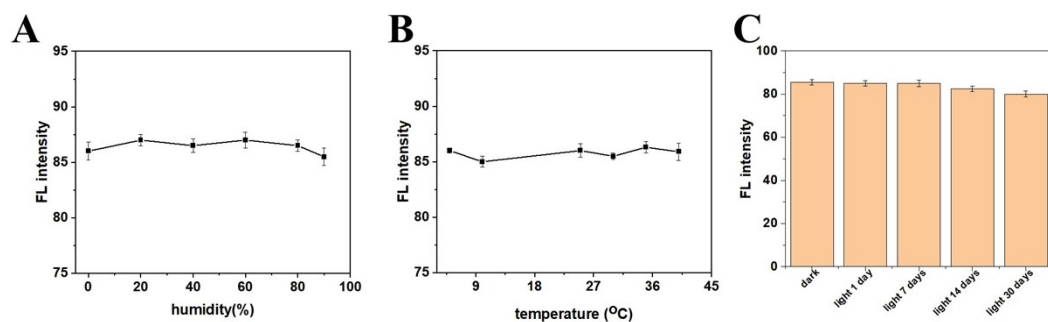

Figure S1 Study of humidity, environmental temperature and light intensity effect on acetone detection by Eu-COF.
